# Supplementary material for: Diagnostic and Prognostic Biomarkers in Renal Clear Cell Carcinoma
Source: MDPI journal article supplement (doi:10.3390/biomedicines10112953), 2022-11-17
Supplement: s1 [file s1]

## **Supplementary information for Weaver et al. Diagnostic and Prognostic Biomarkers in Renal Clear Cell Carcinoma**

|                                                                                                                   |      |
|-------------------------------------------------------------------------------------------------------------------|------|
| Table of contents                                                                                                 | Page |
| Supplementary Table S1: Gene symbols and correlating serial<br>number as presented in Table 3. ....               | 2    |
| Supplementary Table S2: Protein names and symbols with correlating<br>serial number as presented in Table 4. .... | 3    |

Supplementary Table S1: Gene symbols with correlating serial number as presented in Table 3.

| Serial | Gene Symbol                                                                                                                                                                                                                                               |
|--------|-----------------------------------------------------------------------------------------------------------------------------------------------------------------------------------------------------------------------------------------------------------|
| 1.     | <i>VCAM1, EDNRB, RGS5</i>                                                                                                                                                                                                                                 |
| 2.     | <i>MAPT, STK32B, FZD1, RGS5, GIPC2, PDGFD, EPAS1, MAOB, CDH5, TCEA3, LEPROTL1, BNIP3L, EHBP1, VCAM1, PHYH, PRKAA2, SLC4A4, ESD, TLR3, NRP1, C11orf1, ST13, ARNT, C13orf1, SERPINA3, SCLA3, MOXD1, KCNN4, ROR2, FLJ23867, FOXM1, UNG2, GALNT10, GALNT4</i> |
| 3.     | <i>CKAP4, ISPD, MAN2A2, OTOF, SLC40A1</i>                                                                                                                                                                                                                 |
| 4.     | <i>APOLD1, EDNRB, NOS3, PPAP2B, EIF4EBP1, TUBB2A, LMNB1, CEACAM1, CX3CL1, CCL5, IL6, AAMP, ARF1, ATP5E, GPX1, RPLP1</i>                                                                                                                                   |
| 5.     | <i>COL1A1, COL5A1, COL11A1, FN1, ICAM1, ITGAL, ITGAM, ITGB2, THBS2, and TIMP1</i>                                                                                                                                                                         |
| 6.     | <i>ATOH8, ATP1A3, CNGA1, CHMP4C, PLA2G15, PPP1R1A, SPOCK1, NCRNA00116</i>                                                                                                                                                                                 |
| 7.     | <i>CD8, CD3, GZMA/B, PRF1, IDO1, CTLA4, PDL1, ICOS, TIGIT</i>                                                                                                                                                                                             |
| 8.     | <i>AURKB</i>                                                                                                                                                                                                                                              |
| 9.     | <i>KITLG, AURKB, DLG2</i>                                                                                                                                                                                                                                 |
| 10.    | <i>IL6, G6PD, TALDO1, POLD4, SQSTM1, CP, DBN1, TMEM8A, TBC1D7, SERPINA3, GIPC1, BAP1, TKT, TLCD1, SLC4A3, PKM, MTX1</i>                                                                                                                                   |
| 11.    | <i>PBRM1, SETD2, BAP1, VHL</i>                                                                                                                                                                                                                            |

Supplementary Table S2: Protein names and symbols with correlating serial number as presented in Table 4.

| Serial | Protein Name/Symbols                                                                                                                  |
|--------|---------------------------------------------------------------------------------------------------------------------------------------|
| 1.     | Vimentin, alpha-enolase, H2AFX                                                                                                        |
| 2.     | RBP6, TUBB, ZFP3                                                                                                                      |
| 3.     | Bcl-2-L, WAP four-disulfide core domain protein*, Krueppel-like factor 8*, MCP-1, ABPP                                                |
| 4.     | HSC71                                                                                                                                 |
| 5.     | PDZK1                                                                                                                                 |
| 6.     | RKIP/p-RKIP                                                                                                                           |
| 7.     | ANK3, CD44, CGN, CHGA, DQX1, IGF2BP2, IGF2BP3, PABPC1L, KIAA1324, RPL22L1                                                             |
| 8.     | EIF4A1, RPL36A, EXOSC5, RPL28, RPL13, RPS19, RPS2, EEF1A2, OASL                                                                       |
| 9.     | ACC1, AR, MAPK, PDK1, PEA15, SYK, BRAF                                                                                                |
| 10.    | PLOD2, FERMT3, SPARC, SIRP $\alpha$                                                                                                   |
| 11.    | CD300A, SPP1, DIABLO, HM13, LCP1, SF3B5, TIMM44, LOX, HK2, KRT14, KIF2A, IL18, ANGPTL4, NDRG1, P4HB, GUSB, DNMT3, VAV1, HSP90B1, NSA2 |

\*Full names were provided in the original reference, acronyms were not available for these two proteins
